# Supplementary material for: Coacervate-directed synthesis of CaCO3 microcarriers for pH-responsive delivery of biomolecules
Source: Royal Society of Chemistry journal article supplement (doi:10.1039/c4tb01213e), 2014-01-01
Supplement: c4tb01213e1.pdf [file c4tb01213e1.pdf]

## Supporting information

Title: Coacervate-directed synthesis of CaCO<sub>3</sub> microcarriers for pH-responsive delivery of biomolecules

Journal of Materials Chemistry B

Authors: Victor Lauth,<sup>a</sup> Michael Maas,<sup>a</sup> Kurosch Rezwan<sup>a</sup>

<sup>a</sup> Advanced Ceramics, University of Bremen  
Am Biologischen Garten 2, 28359  
Bremen, Germany

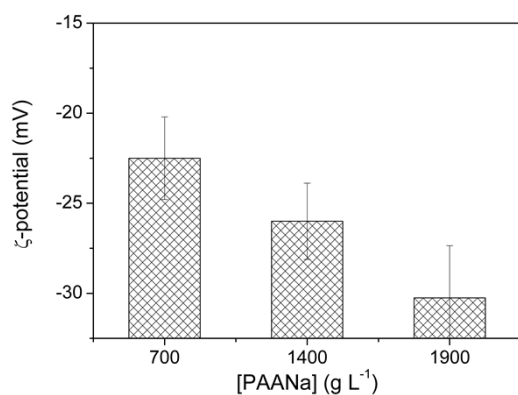

**Figure S1.** Size-distribution of the native coacervate droplets at different complexation time points. The tail is located at the large diameter side of the curve, which suggests the coalesce grow mechanism.

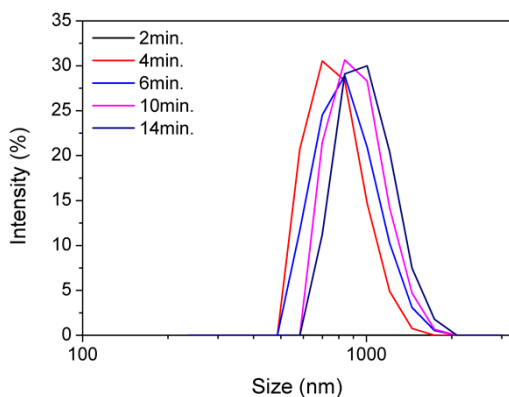

**Figure S2.** Zeta-potential of coacervates droplets at pH 9. The zeta-potential decreases with the increase of negatively charged PAA.

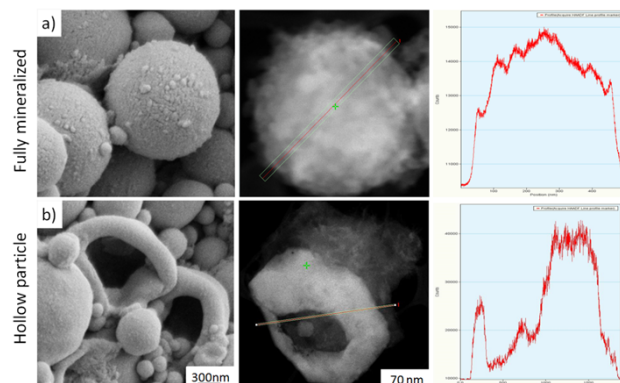

**Figure S3.** SEM, TEM and HAADF-STEM of fully mineralized microcarriers (a) and hollow capsules (b).

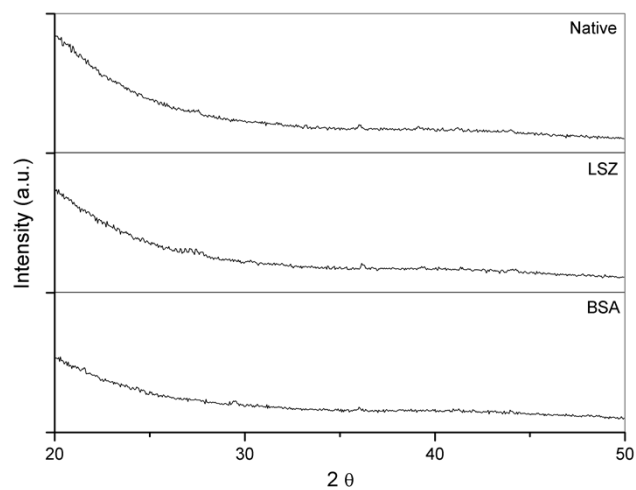

**Figure S4.** Comparison of X-ray diffraction patterns of native, BSA and LSZ-loaded microcarriers.
